# Supplementary material
Source: PubMed Central journal article supplement (PMC3952429)
Supplement: NIHMS559322-supplement-Supplemetal_Material.pdf [file NIHMS559322-supplement-Supplemetal_Material.pdf]

## **SUPPLEMENTAL MATERIAL**

### **A Novel Lipid Droplet-Associated Serine Hydrolase Regulates Macrophage Cholesterol Mobilization.**

Goo. A novel player in CE turnover from macrophages.

Young-Hwa Goo, PhD, Se-Hee Son, PhD, Paul B. Kreienberg, MD and Antoni Paul, PhD.

From the Center for Cardiovascular Sciences, Albany Medical College, Albany, NY (Y-H. G., S-H.S., and A.P) and the Institute for Vascular Health and Disease, Albany, NY (P.B.K.).

Correspondence to Young-Hwa Goo or Antoni Paul. Center for Cardiovascular Sciences, Albany Medical College, 47 New Scotland Avenue, MC-8, Albany, NY 12208. United States of America. Tel: +1 518 262 1158; Fax: +1 518 262 8101. E-mail addresses: [gooy@mail.amc.edu](mailto:gooy@mail.amc.edu) (Y-H. Goo), [paula@mail.amc.edu](mailto:paula@mail.amc.edu) (A. Paul).

**A**

NH2-**vlaapqeesnaqk**-COOH  
 NH2-**iedvyglnqjehk**-COOH  
 NH2-**rdddiikeflpk**-COOH  
 NH2-**srfpvwiishagfsvtpk**-COOH  
 NH2-**srfpvwiishagfsvtpk**-COOH  
 NH2-**fpvwiishagfsvtpk**-COOH  
 NH2-**rvpelpvahaflfptier**-COOH  
 NH2-**rvpelpvahaflfptier**-COOH  
 NH2-**vpelpvahaflfptier**-COOH  
 NH2-**vpelpvahaflfptier**-COOH  
 NH2-**qlifiipgnpgysafyvpfak**-COOH

**B**

NH2-maseveeqipvreefflcggvetkiikcgpwtnlfekqdvskpk**qlifiipgnpgysafy**  
**vpfak**alytlmk**srfpvwiishagfsvtpk**dkk**vlaapqeesnaqkiedvyglnqjehk**  
 iaflrahvpkdvklilighsvgtymtlhvmk**rvpelpvahaflfptier**msespngkfatpflcqf  
 ryllyatsyllfkpcpeviksfiiqklmgqmniklelpltdilqpfclanaaylgsqemvqivk**rdddi**  
**ikeflpk**lkfygktdgwcpvkyyedmkkdfpegniylcekgiphafvldfsqemativaewin  
 nrpprk-COOH

**Figure SI. mLDAH peptides identified by LC-MS/MS. (A)** Sequences of the 11 LDAH hits identified in the LD fraction of RAW 264.7 macrophages. Identical peptide sequences are shown in the same color. **(B)** Alignment of the peptides identified by LC-MS/MS with the mLDAH sequence.

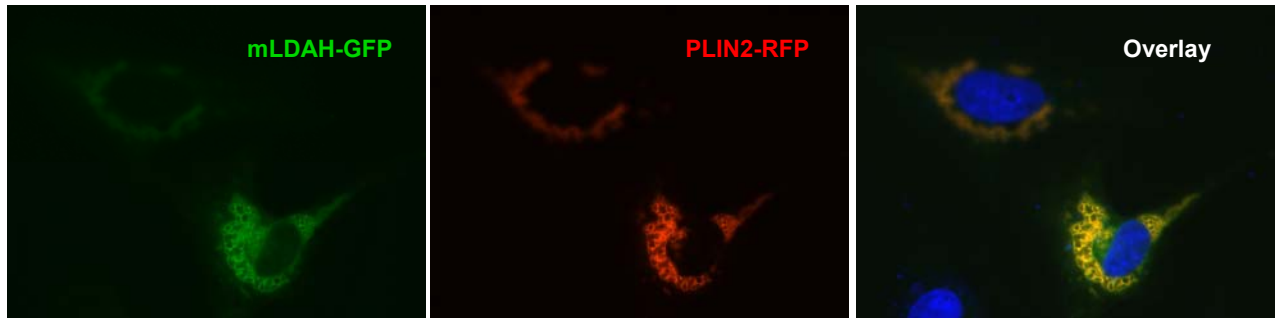

**Figure SII. mLDAH-GFP colocalizes with PLIN2 at the LD surface.** HeLa cells were co-transfected with mLDAH-GFP (green) and PLIN2-RFP (a LD marker, red) and treated with oleic acid (360  $\mu$ M) for 18h.

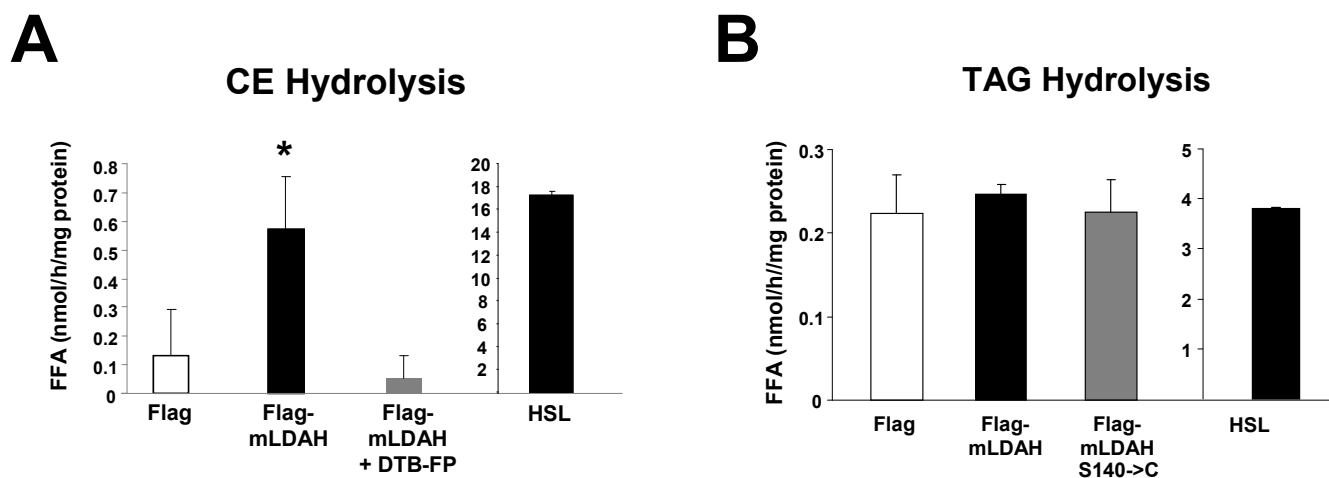

**Figure III.** (A) *In vitro* CE activity assays on protein extracts from HeLa cells transfected with flag- or flag-mLDAH. The activity of the flag-mLDAH lysates was also measured in samples pre-treated with DTB-FP, which acts as a serine hydrolase inhibitor. (n=3). \*p<0.05. (B) *In vitro* TAG activity assays on protein extracts from HeLa cells transfected with flag-, flag-mLDAH or flag-(S140->C)-mLDAH. (n=3). HSL was used as a positive control for both CE and TAG activities.

**Untreated**

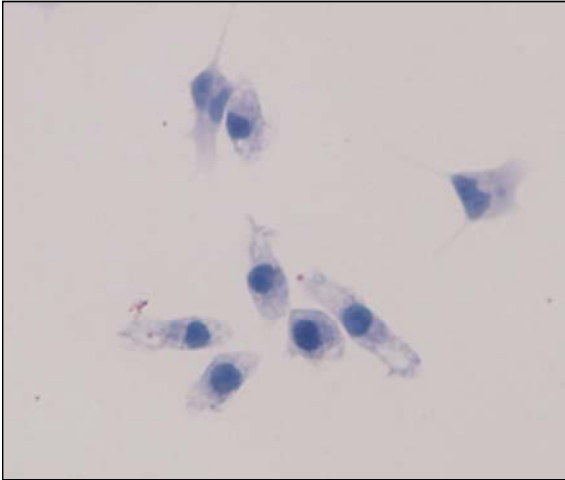

**10  $\mu\text{g/ml}$  CHOL:M $\beta$ CD**

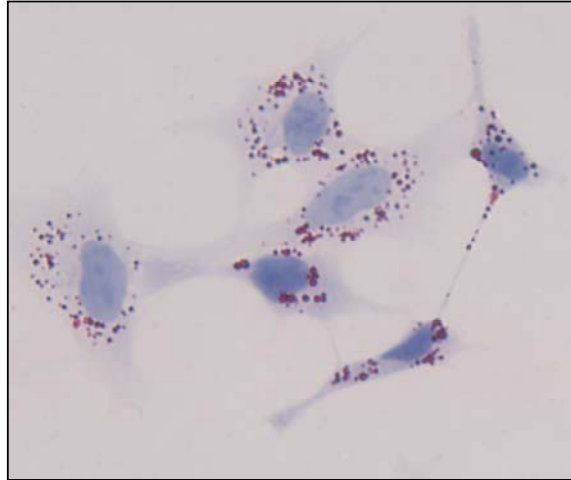

**Figure SIV. CHOL:M $\beta$ CD treatment induces LD formation in HEK293 cells.** HEK293 cells remained untreated or were treated with CHOL:M $\beta$ CD (10  $\mu\text{g/ml}$ ). Oil red-O was used to stain neutral lipid (Red). Hematoxylin (blue) was used to stain cell nuclei.

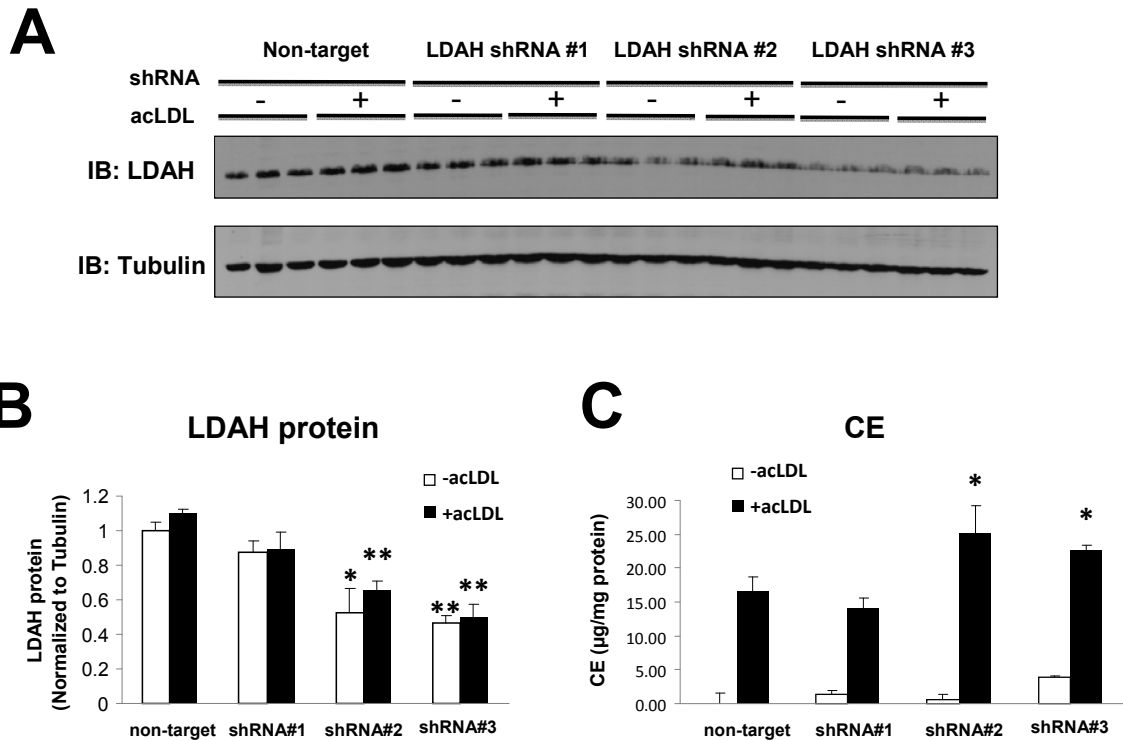

**Figure SV. shRNAs that downregulated mLDAH increased CE content in RAW 264.7 macrophages.** Three lentiviral shRNAs were tested for mLDAH downregulation in RAW 264.7 macrophages. RAW 264.7 remained untreated (-acLDL) or were treated with acLDL (+acLDL; 50 µg/ml). **(A)** Immunoblots were performed to determine the level of protein downregulation. **(B)** Quantification of the mLDAH bands intensity relative to tubulin. **(C)** Intracellular CE levels. n=3. All data are shown as mean ± SD. \*p<0.05,\*\*p<0.005; t-test.

**A**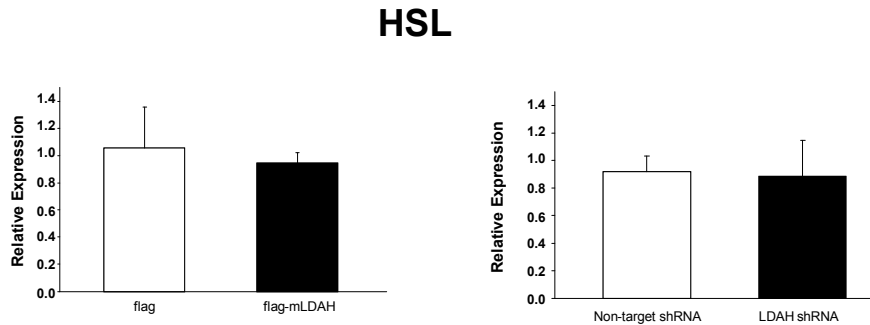**B**

**NCEH1/KIAA1363/AADA1**

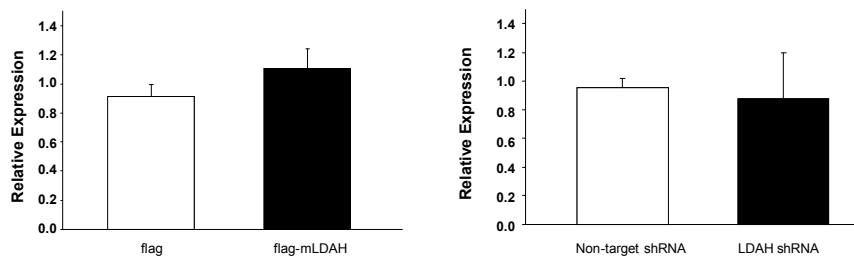**C**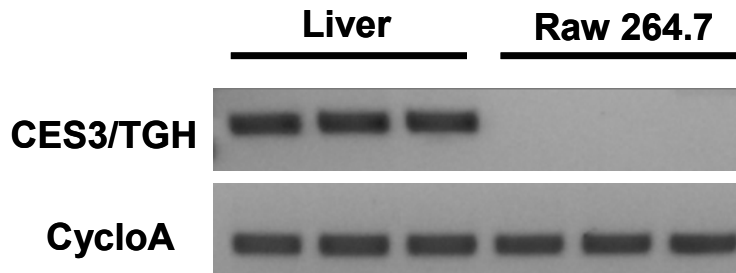

**Figure SVI. mLDAH overexpression or downregulation did not change the expression of other candidate CE hydrolases.** qPCR analysis of HSL (**A**) and NCEH1/KIAA1363/AADA1 (**B**) mRNA levels relative to cyclophilin A (CycloA) in Raw 264.7 macrophages transfected with flag-mLDAH or with lentiviral mLDAH shRNA-mediated knockdown. Cells were treated with acLDL (50  $\mu$ g/ml) for 24h. (n=3). (**C**) CES3/TGH mRNA was undetectable in Raw 264.7 macrophages after 40 cycles of PCR amplification. Liver RNA was used a positive as control for this experiment.

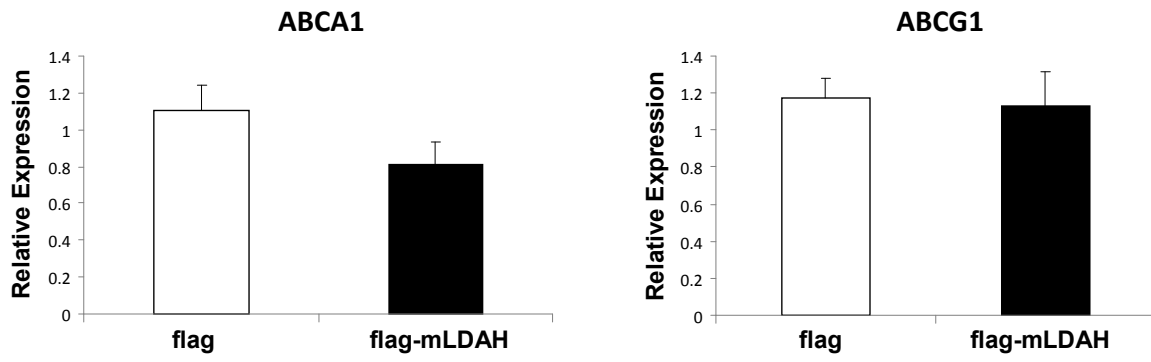

**Figure SVII. ABCA1 and ABCG1 mRNA levels were not changed by mLDAH overexpression.** Raw 264.7 macrophages were transfected with flag- or flag-mLDAH and incubated for 24 with acLDL (50 $\mu$ g/ml). ABCA1 and ABCG1 mRNA levels were quantified by qPCR and normalized to cyclophilin (n=3).



**Table SI.** Sequences of primers, siRNAs and shRNAs, used for the studies. The experiments shown in Figure 4B were performed using mLDAH shRNA #3.

| <b>Primers</b>           | <b>Sequence</b>                                                              |
|--------------------------|------------------------------------------------------------------------------|
| mLDAH                    | Forward: 5'-tttcggtgactcccaaagac-3'<br>Reverse: 5'-cttcatcacgtgaagggtca-3'   |
| LCM-mLDAH                | Forward: 5'-ctggtgtctgcacaaggatg-3'<br>Reverse: 5'-gattcccaccagtgaccaag-3'   |
| ABCA1                    | Forward: 5'-ctccaggattttctggtgga-3'<br>Reverse: 5'-cacagagggcagaaacttc-3'    |
| ABCG1                    | Forward: 5'-tccatcgtctgtaccatcca-3'<br>Reverse: 5'-tactcccctgatgccacttc-3'   |
| HSL                      | Forward: 5'-atgtgcacttctggaaagcct-3'<br>Reverse: 5'-agcaggcggcttaccctcaca-3' |
| NCEH1/ KIAA1363/ AADACL1 | Forward: 5'-tctccgaaaccagaagagcc-3'<br>Reverse: 5'-tgtgcacagctggtcatagt-3'   |
| CES3/TGH                 | Forward: 5'-agatcactgcaggggacaaa-3'<br>Reverse: 5'-gatccaaggcgatactgga-3'    |
| Cyclophilin A            | Forward: 5'-tttggaagggtgaaagaagg-3'<br>Reverse: 5'-ttacaggacattgcgagcag-3'   |
| <b>siRNAs</b>            |                                                                              |
| hLDAH                    | Sense: GGACAUUUAUGGACUAAAUtt<br>Antisense: AUUUAGUCCAUAAAUGUCctt             |
| <b>shRNAs</b>            |                                                                              |
| mLDAH shRNA #1           | Sense: CCGUGUCCUGAAGUCAUAA<br>Antisense : UUAUGACUUCAGGACACGG                |
| mLHAH shRNA #2           | Sense: UCGAUACCUGCUCUAUGCU<br>Antisense : AGCAUAGAGCAGGUAUCGA                |
| <b>mLDAH shRNA #3</b>    | <b>Sense: CUCAGAAGUCGAGGAACAA</b><br><b>Antisense : UUGUCCUCGACUUCUGAG</b>   |

**Table SII.** LD associated proteins identified by LC-MS/MS. The references indicate proteins found in other LD proteomic analyses in mammalian cells.

| Fragment     | Protein Name                             | Peptides  | GI              | MW (kDa)    | References        |         |
|--------------|------------------------------------------|-----------|-----------------|-------------|-------------------|---------|
| <b>1</b>     | BIP                                      | 9         | 2598562         | 72.5        | 1-9               |         |
|              | Unnamed                                  | 4         | 74147026        | 83.5        |                   |         |
|              | Plastin-2                                | 3         | 31543113        | 70.7        |                   |         |
|              | UBXN4                                    | 3         | 30913398        | 56.8        | 8                 |         |
| <b>2</b>     | Vimentin                                 | 12        | 2078001         | 51.6        | 1, 2              |         |
|              | PLPL2 (ATGL)                             | 8         | 81896337        | 54.5        | 2, 4, 8           |         |
|              | Ubiquitin B                              | 8         | 18044723        | 34.4        | 4                 |         |
|              | Prolyl-4-Hydrolase                       | 7         | 42415475        | 57.4        | 2-4               |         |
|              | CAP-1                                    | 6         | 729032          | 51.9        |                   |         |
|              | Unnamed                                  | 6         | 12852157        | 58.8        |                   |         |
|              | Pyruvate kinase M                        | 4         | 551295          | 58.4        | 2                 |         |
|              | Alpha-tubulin 8                          | 3         | 8394493         | 50.7        |                   |         |
|              | PLC $\alpha$                             | 3         | 200397          | 57.0        | 2                 |         |
| <b>3</b>     | Perilipin 2 (ADFP)                       | 48        | 116235489       | 46.9        | 1-8, 10-12        |         |
|              | Enolase 1alpha                           | 7         | 70794816        | 47.5        | 2                 |         |
|              | Protein disulfide-isomerase A3           | 5         | 112293264       | 57.1        | 5-7               |         |
|              | Interferon gamma induced GTPase          | 4         | 28261389        | 48.8        |                   |         |
|              | LysoPC acyltransferase 1                 | 3         | 148747363       | 60.4        | 8                 |         |
|              | Gamma-actin                              | 29        | 809561          | 41.3        |                   |         |
| <b>4</b>     | Ancient ubiquitous protein               | 12        | 90403601        | 49.7        | 1, 3, 4, 8        |         |
|              | Unnamed                                  | 6         | 74144652        | 38.9        |                   |         |
|              | VAT-1                                    | 6         | 33859662        | 43.3        | 3-5, 12           |         |
|              | ABHD5 (CGI-58)                           | 5         | 13385690        | 39.5        | 1, 2, 4, 6, 8, 12 |         |
|              | IRGM-1                                   | 3         | 6680351         | 47.1        | 12                |         |
|              | <b>RIKEN cDNA 1110057K04 gene (LDAH)</b> | <b>11</b> | <b>55777092</b> | <b>37.7</b> |                   |         |
|              | Unnamed                                  | 7         | 74142813        | 50.5        |                   |         |
| <b>5</b>     | Annexin A1                               | 5         | 124517663       | 39.0        | 12                |         |
|              | Annexin A2                               | 4         | 6996913         | 38.9        | 2, 4, 10, 12      |         |
|              | Unnamed                                  | 4         | 74181454        | 50.8        |                   |         |
|              | Ribosomal protein, large, P0             | 3         | 13277927        | 34.3        | 2                 |         |
|              | <b>6</b>                                 | RAB7      | 13              | 1050551     | 23.8              | 1-8     |
|              |                                          | DHRS-1    | 9               | 31980844    | 34.5              | 2, 4, 8 |
| Diaphorase-1 |                                          | 8         | 19745150        | 34.3        | 1-4, 6-8, 10      |         |
| RAB2A        |                                          | 7         | 10946940        | 23.7        | 2, 7, 8, 12       |         |
| RAB11B       |                                          | 6         | 6679583         | 24.6        | 7, 8, 12          |         |
| RAB14        |                                          | 6         | 63087697        | 22.1        | 1, 2, 4, 7        |         |
| RAB5C        |                                          | 5         | 113866024       | 23.6        | 1-3, 7, 10, 12    |         |
| HSP70        |                                          | 5         | 309319          | 71          | 1, 2, 4, 6, 9, 11 |         |
| RAB18        |                                          | 4         | 30841008        | 23.3        | 1-4, 6-8, 12      |         |
| RAP1B        |                                          | 3         | 7661678         | 21.0        | 8, 10, 12         |         |

## References

1. Brasaemle DL, Dolios G, Shapiro L, Wang R. Proteomic Analysis of Proteins Associated with Lipid Droplets of Basal and Lipolytically Stimulated 3T3-L1 Adipocytes. *J Biol Chem*;279:46835-42.
2. Bartz R, Zehmer JK, Zhu M, Chen Y, Serrero G, Zhao Y, Liu P. Dynamic activity of lipid droplets: protein phosphorylation and GTP-mediated protein translocation. *J Proteome Res* 2007;6:3256-65.
3. Sato S, Fukasawa M, Yamakawa Y, Natsume T, Suzuki T, Shoji I, Aizaki H, Miyamura T, Nishijima M. Proteomic profiling of lipid droplet proteins in hepatoma cell lines expressing hepatitis C virus core protein. *J Biochem* 2006;139:921-30.
4. Wan HC, Melo RC, Jin Z, Dvorak AM, Weller PF. Roles and origins of leukocyte lipid bodies: proteomic and ultrastructural studies. *FASEB J* 2007;21:167-78.
5. Turro S, Ingelmo-Torres M, Estanyol JM, Tebar F, Fernandez MA, Albor CV, Gaus K, Grewal T, Enrich C, Pol A. Identification and characterization of associated with lipid droplet protein 1: A novel membrane-associated protein that resides on hepatic lipid droplets. *Traffic* 2006;7:1254-69.
6. Umlauf E, Csaszar E, Moertelmaier M, Schuetz GJ, Parton RG, Prohaska R. Association of stomatin with lipid bodies. *J Biol Chem* 2004;279:23699-709.
7. Liu P, Ying Y, Zhao Y, Mundy DI, Zhu M, Anderson RGW. Chinese Hamster Ovary K2 Cell Lipid Droplets Appear to Be Metabolic Organelles Involved in Membrane Traffic. *J Biol Chem* 2004 January 30;279(5):3787-92.
8. Larsson S, Resj+<sub>1</sub> S, Gomez MF, James P, Holm C. Characterization of the Lipid Droplet Proteome of a Clonal Insulin-producing +<sub>1</sub>-Cell Line (INS-1 832/13). *J Proteome Res* 2012;11:1264-73.
9. Wang H, Gilham D, Lehner R. Proteomic and lipid characterization of apolipoprotein B-free luminal lipid droplets from mouse liver microsomes: implications for very low density lipoprotein assembly. *J Biol Chem* 2007;282:33218-26.
10. Fujimoto Y, Itabe H, Sakai J, Makita M, Noda J, Mori M, Higashi Y, Kojima S, Takano T. Identification of major proteins in the lipid droplet-enriched fraction isolated from the human hepatocyte cell line HuH7. *Biochimica et Biophysica Acta (BBA) - Molecular Cell Research* 2004;1644:47-59.

11. Wu CC, Howell KE, Neville MC, Yates JR, III, McManaman JL. Proteomics reveal a link between the endoplasmic reticulum and lipid secretory mechanisms in mammary epithelial cells. *Electrophoresis* 2000;21:3470-82.
12. Zhang H, Wang Y, Li J, Yu J, Pu J, Li L, Zhang H, Zhang S, Peng G, Yang F, Liu P. Proteome of skeletal muscle lipid droplet reveals association with mitochondria and apolipoprotein a-I. *J Proteome Res* 2011;10:4757-68.
